# Supplementary material
Source: HighWire-hosted journal article supplement (https://jnm.snmjournals.org/highwire/filestream/95179/field_highwire_adjunct_files/0/181586_Supplemental_Data.pdf)
Supplement: 181586_Supplemental_Data.pdf [file 181586_Supplemental_Data.pdf]

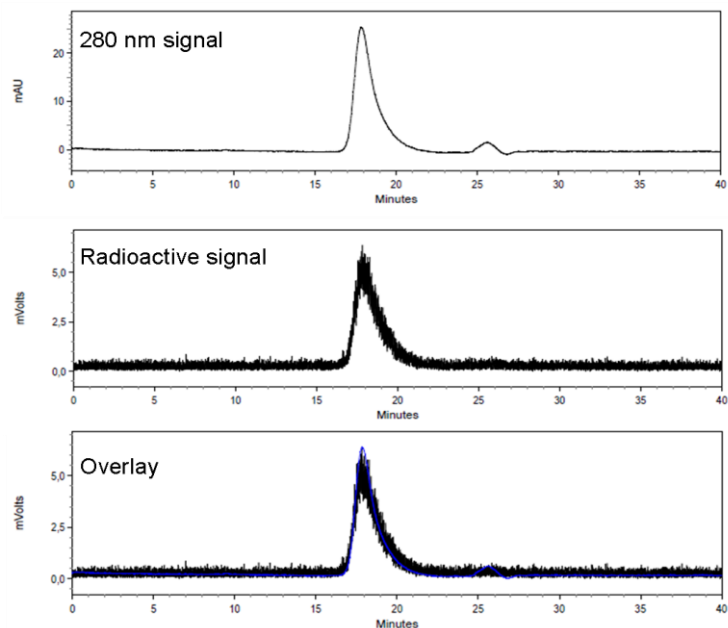

**SUPPLEMENTAL FIGURE 1.** A typical HPLC chromatogram of  $^{89}\text{Zr}$ -MSB0010853. At 280 nm  $^{89}\text{Zr}$ -MSB0010853 could be detected with a retention time of approximately 18 min, corresponding with co-registered radioactive signal. The small peak at ~25 min represents the solvent of  $^{89}\text{Zr}$ -MSB0010853.

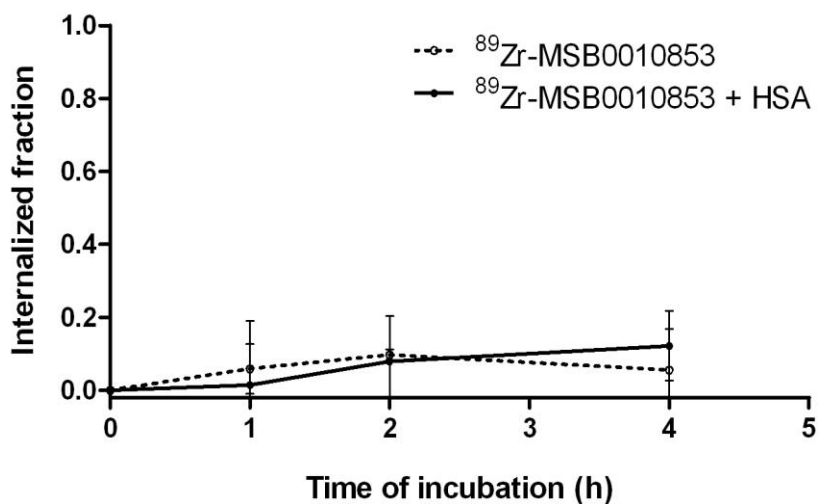

**SUPPLEMENTAL FIGURE 2.** Internalization of  $^{89}\text{Zr-MSB0010853}$  in H441 cells with and without the presence of HSA. Data is presented as mean  $\pm$  SD.
